# Supplementary material
Source: Springer Nature journal article supplement (https://www.springermedizin.de/resource/supplementary/12985_2009_783_MOESM4_ESM.pdf/9609188)

SNA

MAL-I

MAL-II

NE

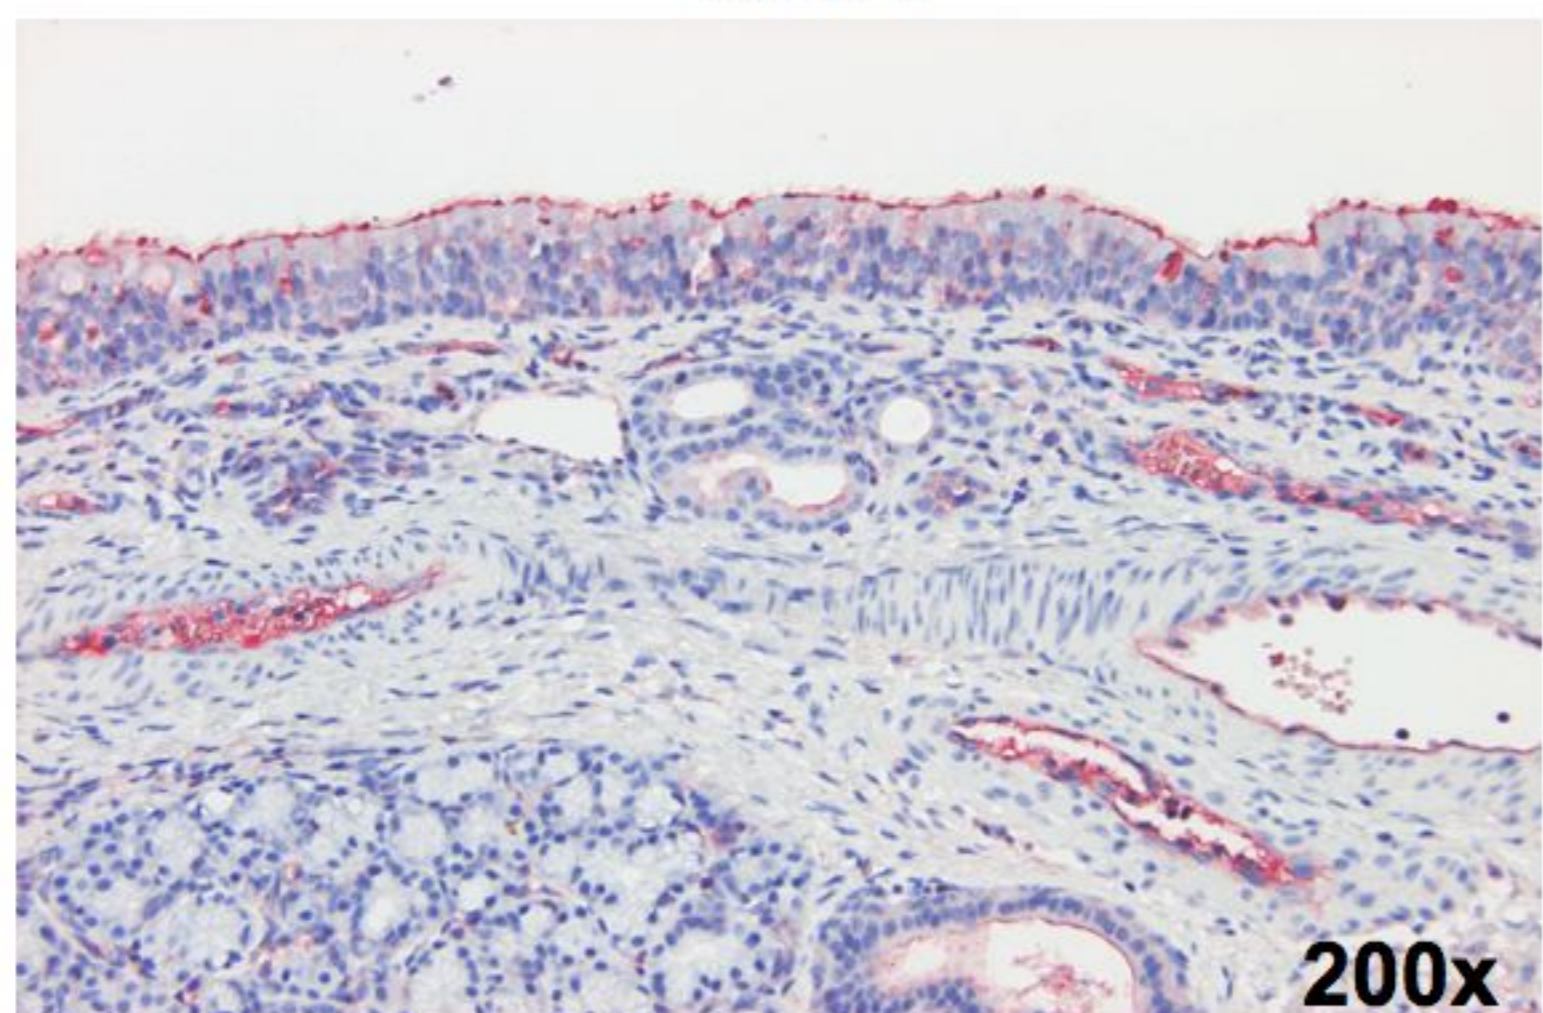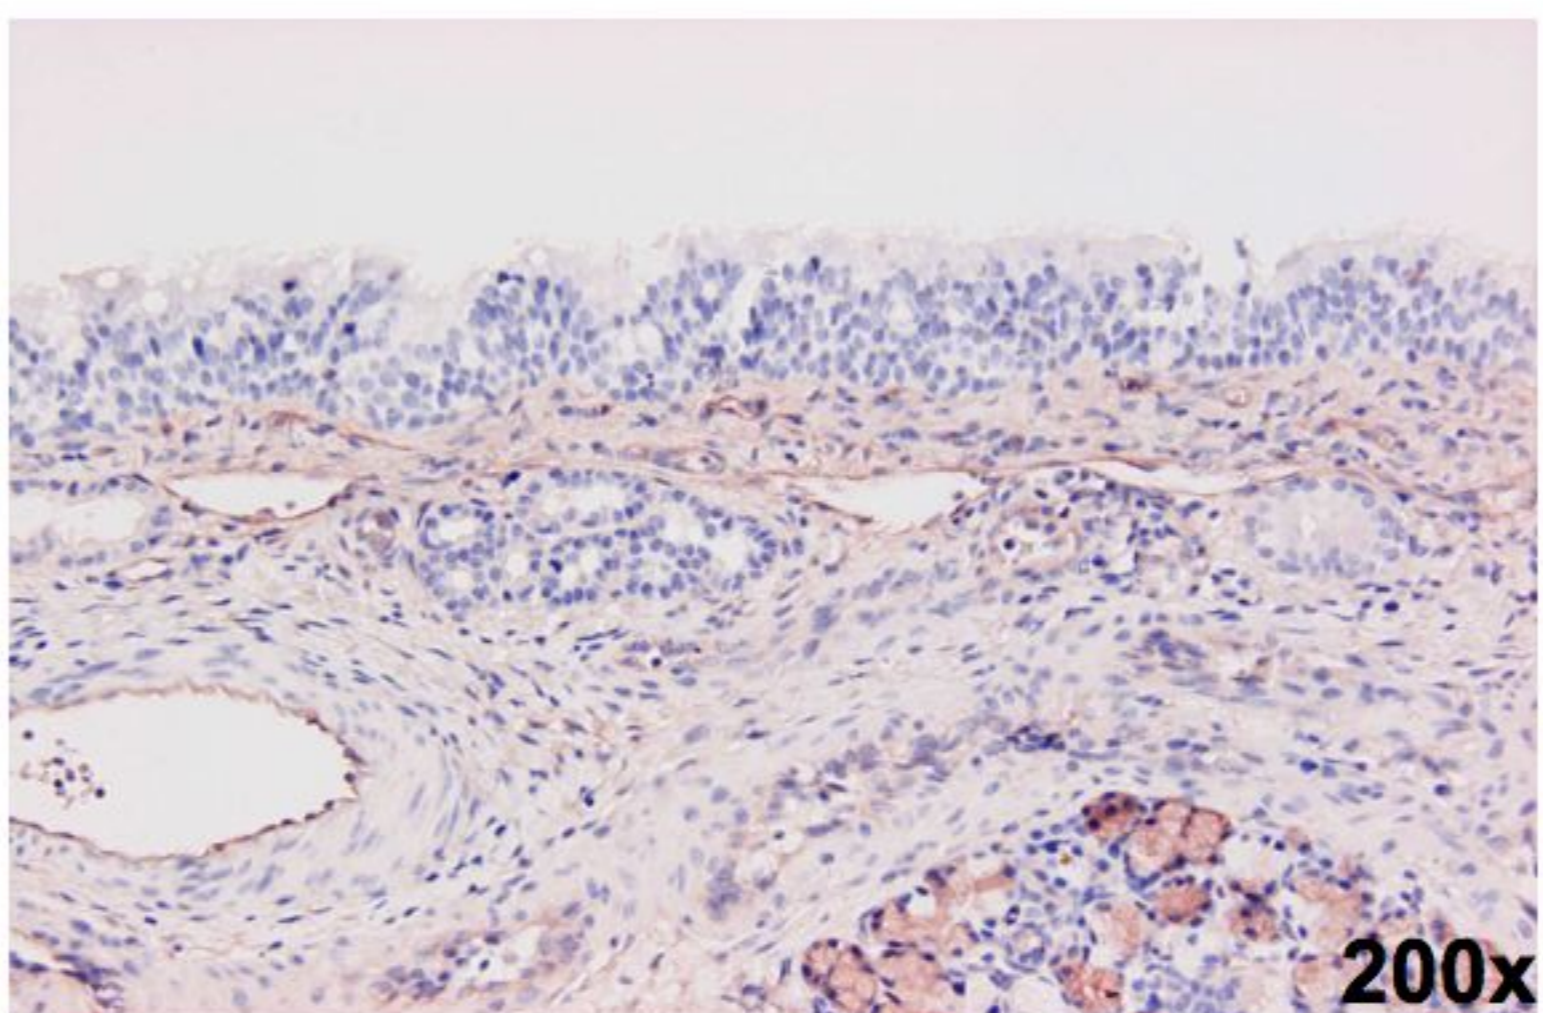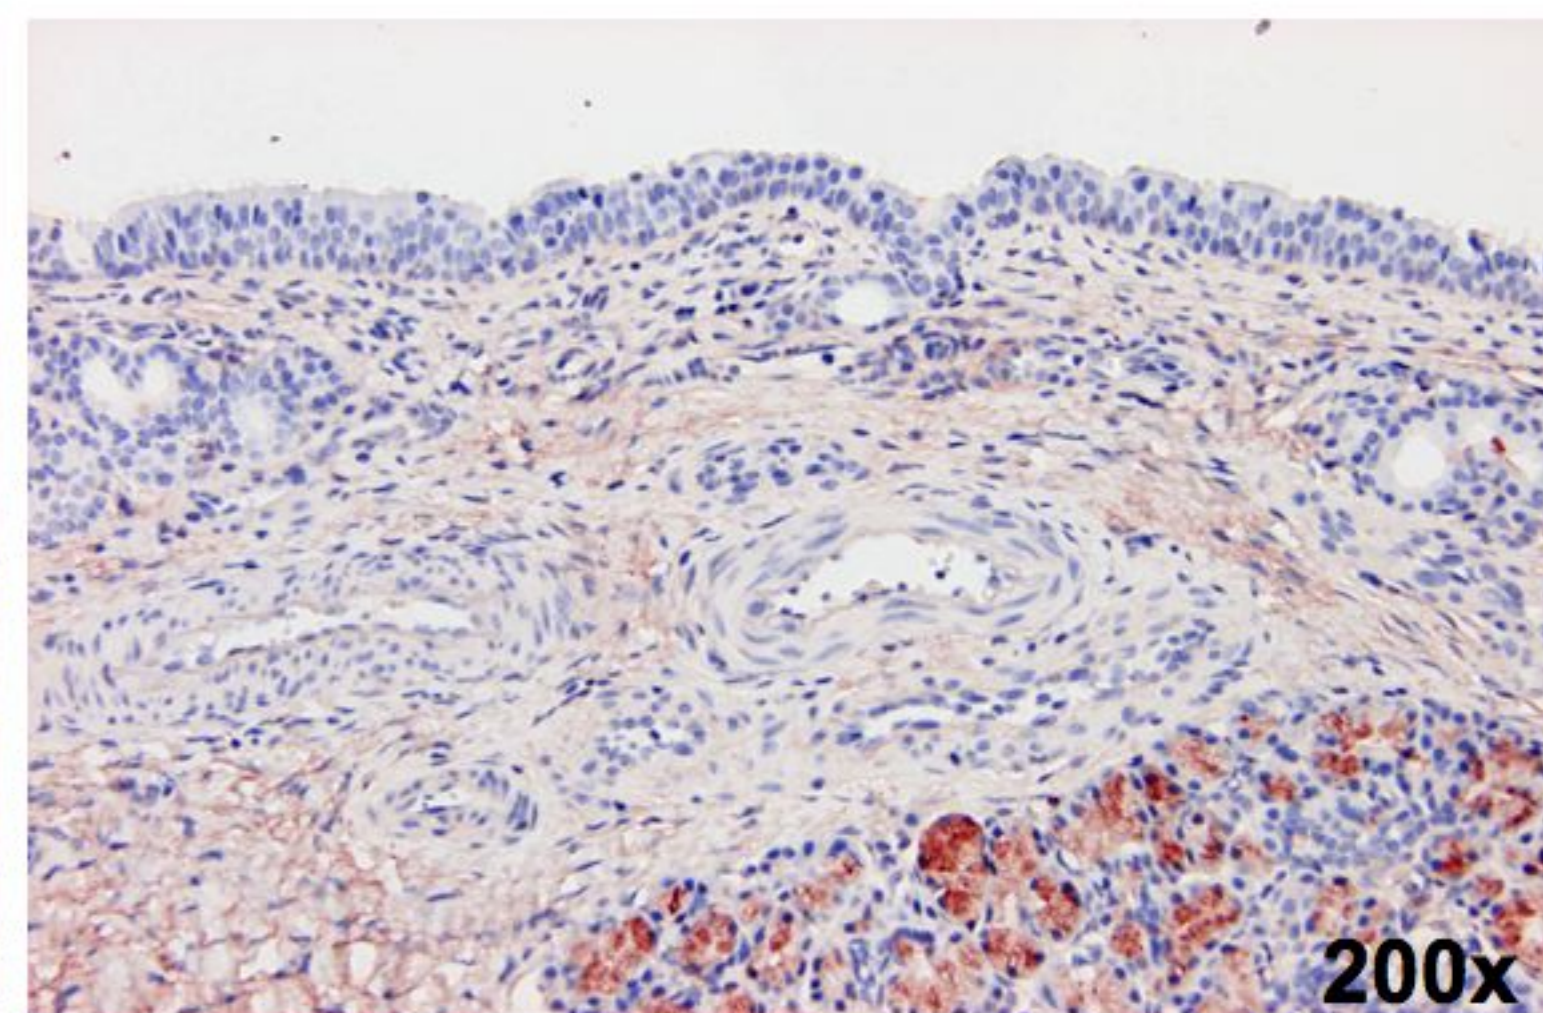

TOC

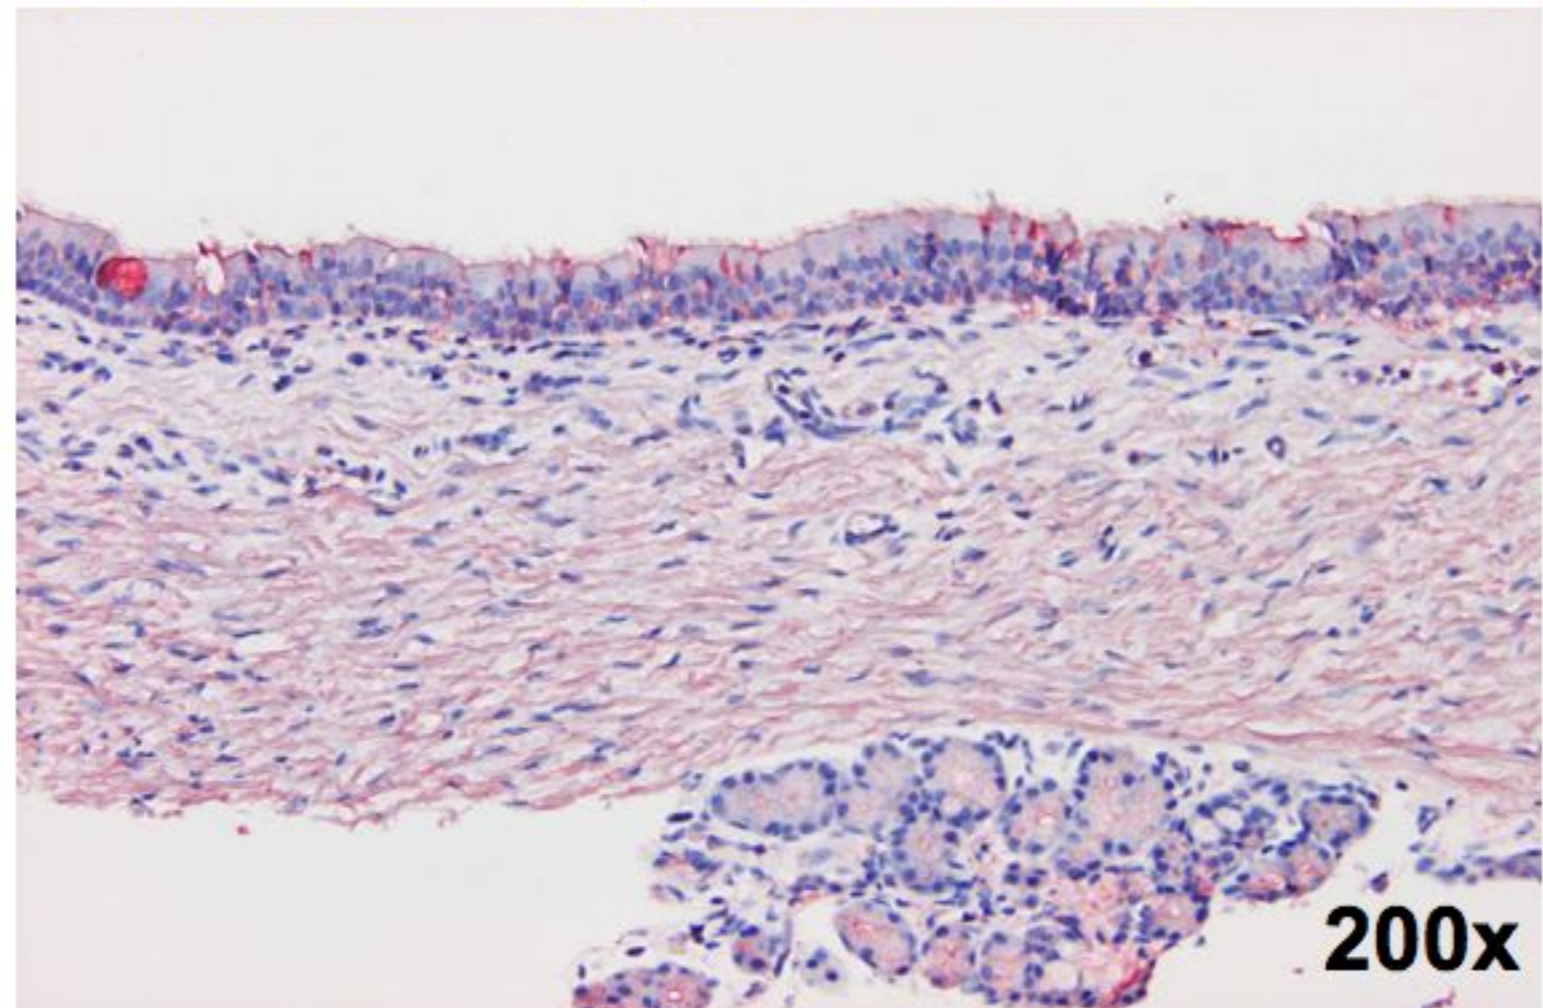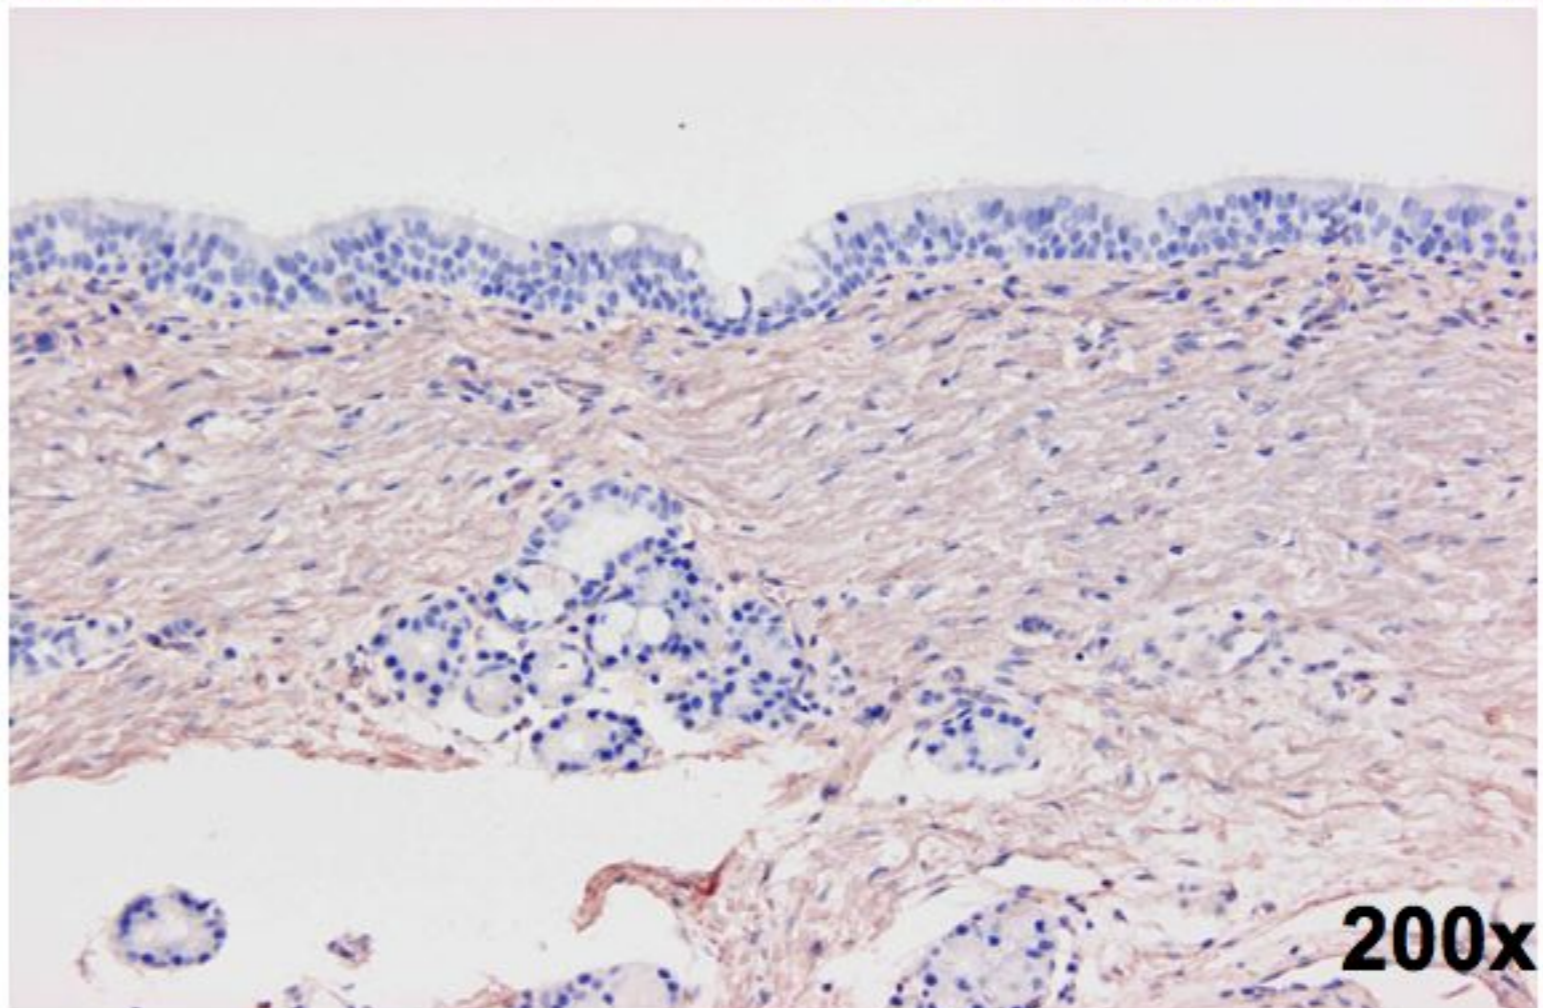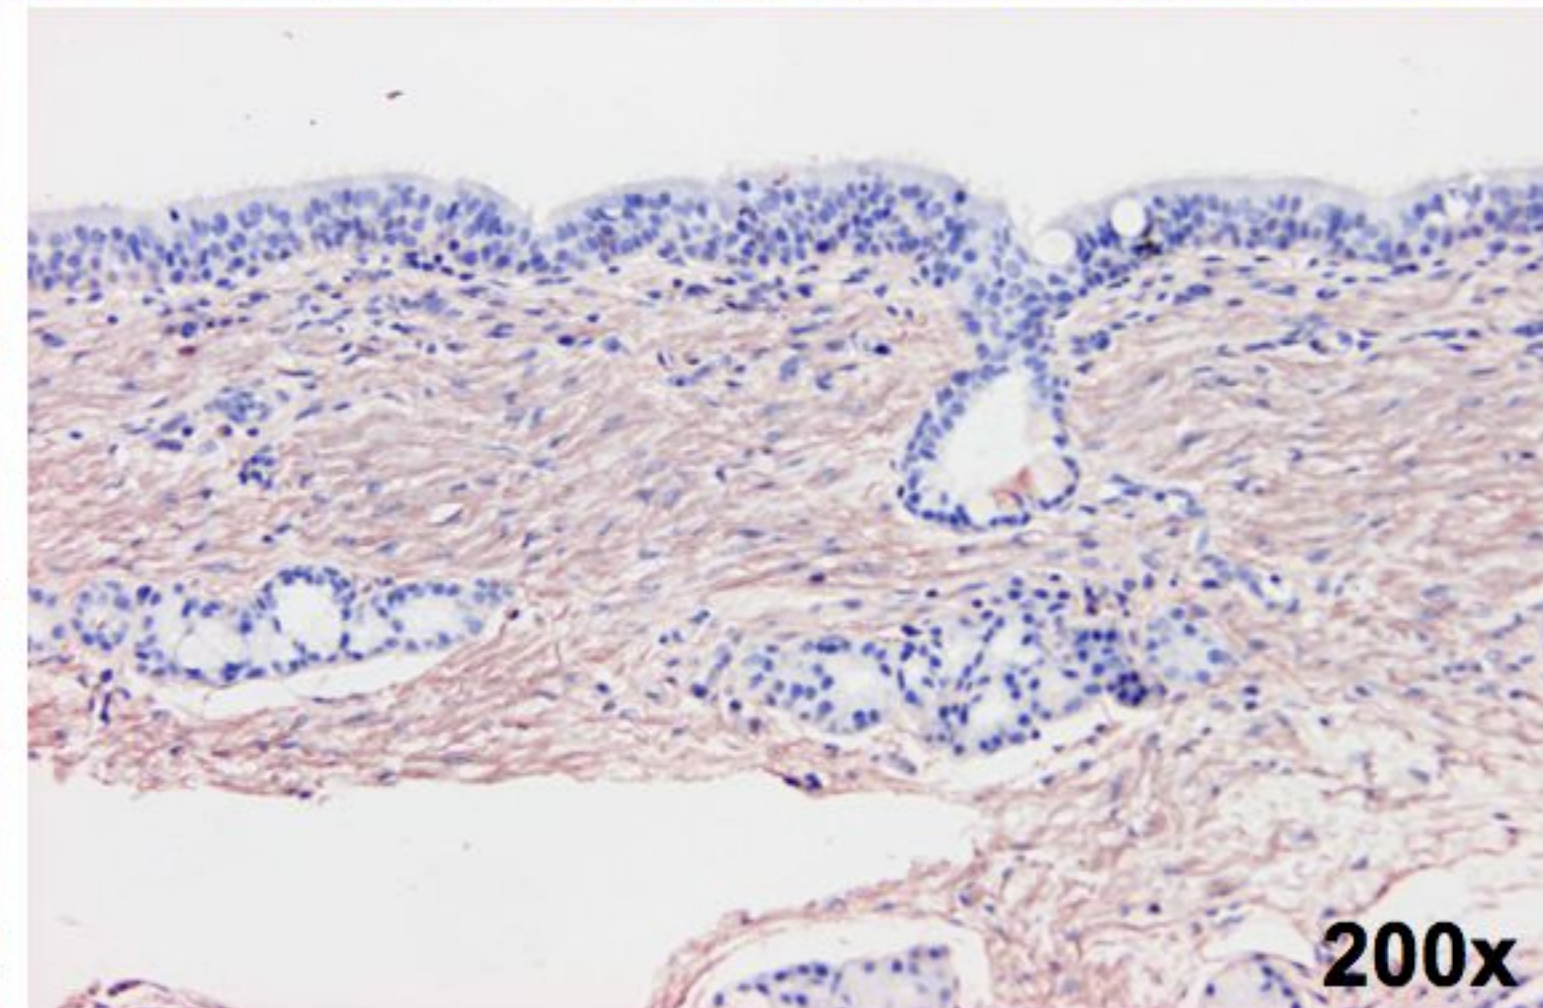

BOC

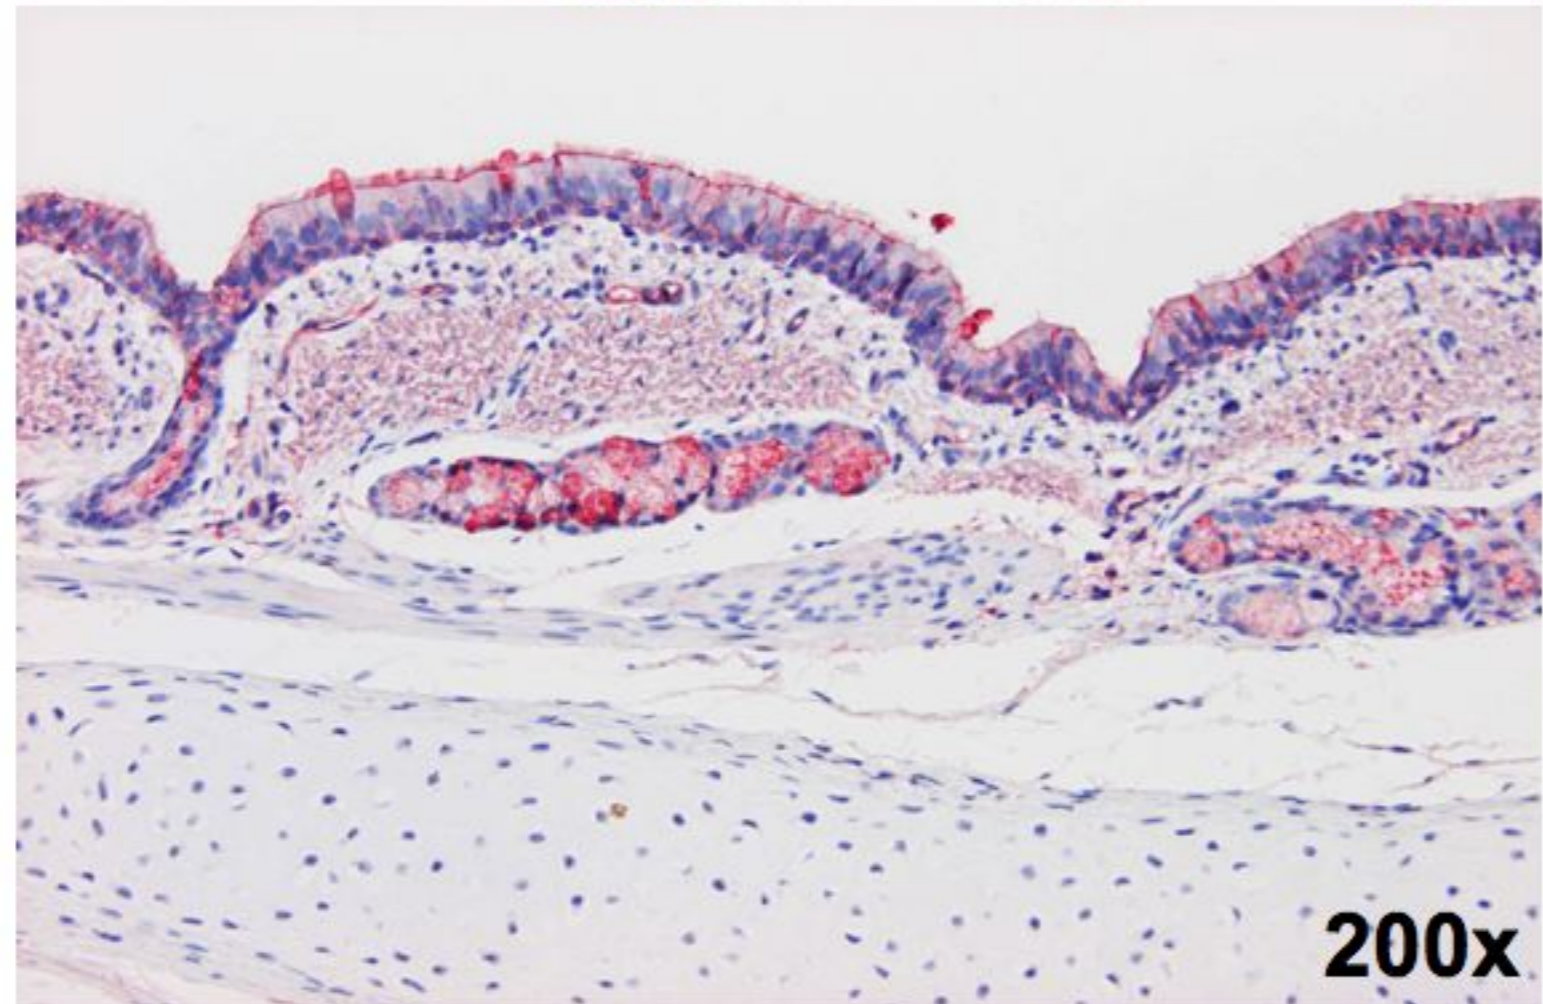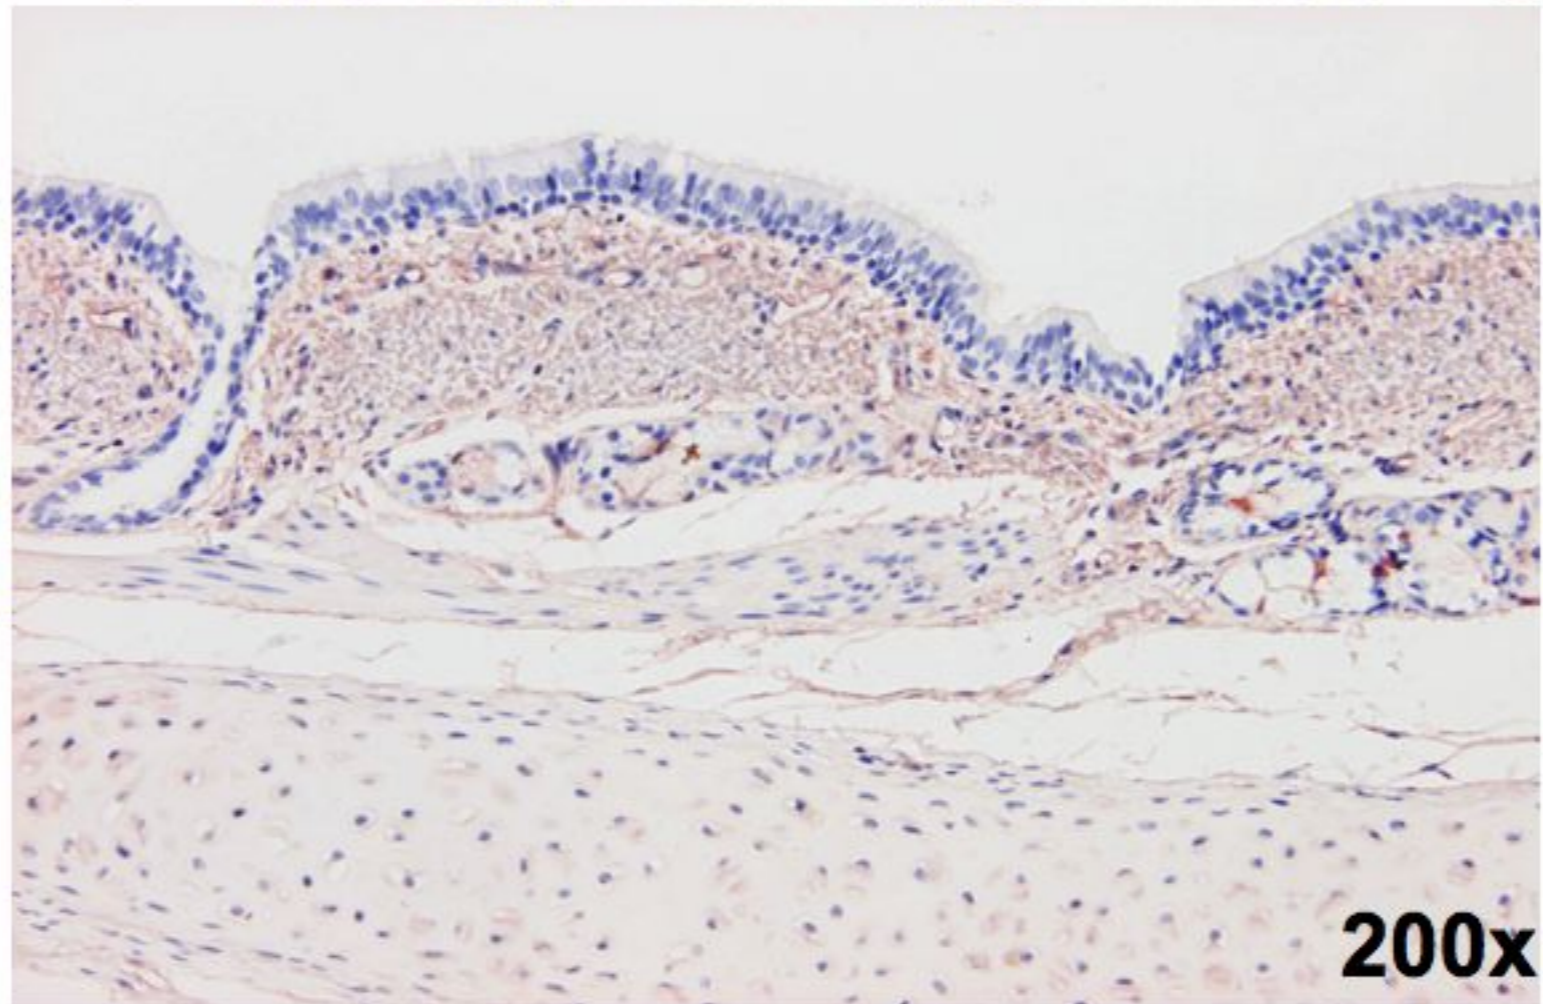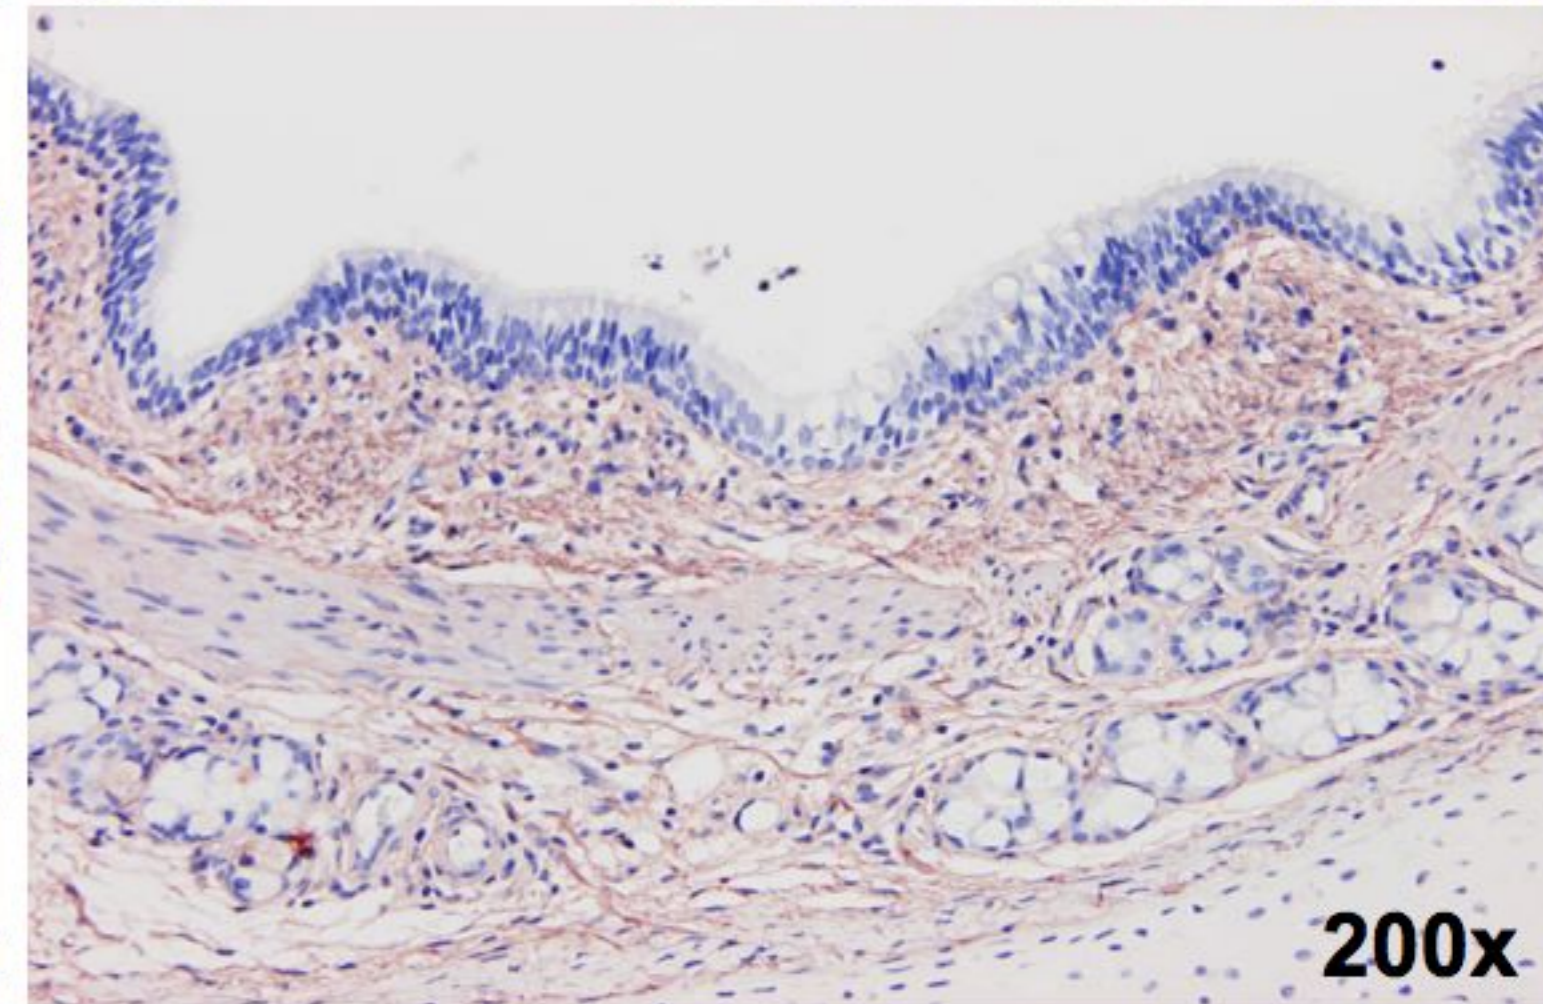

Bronch.

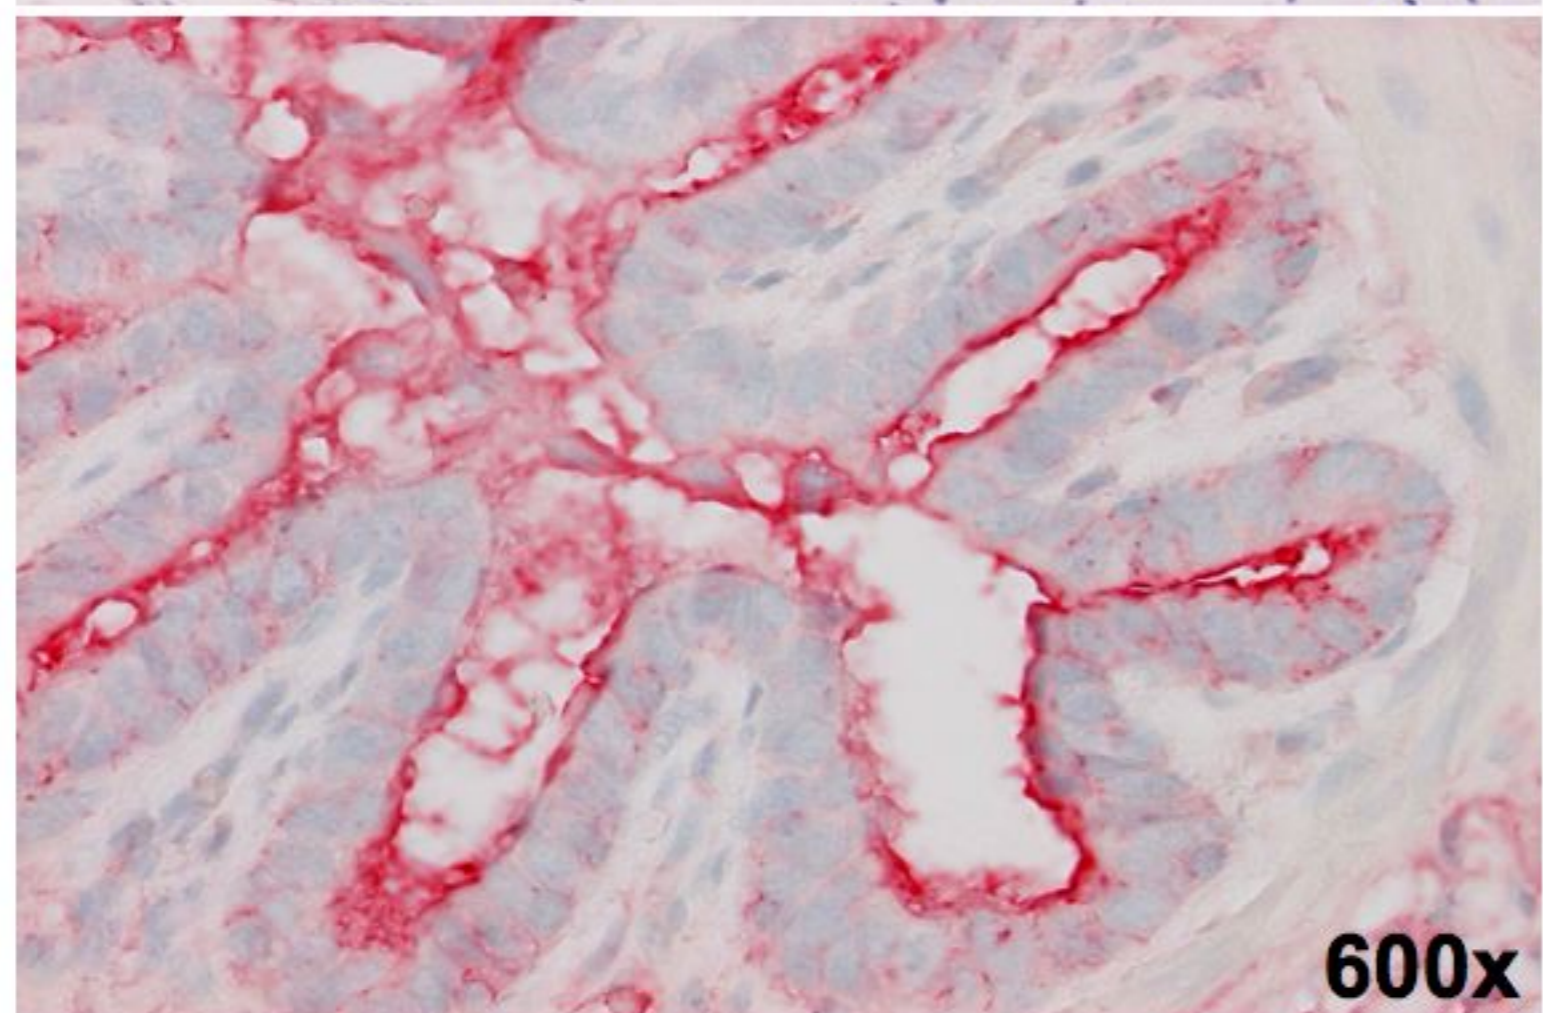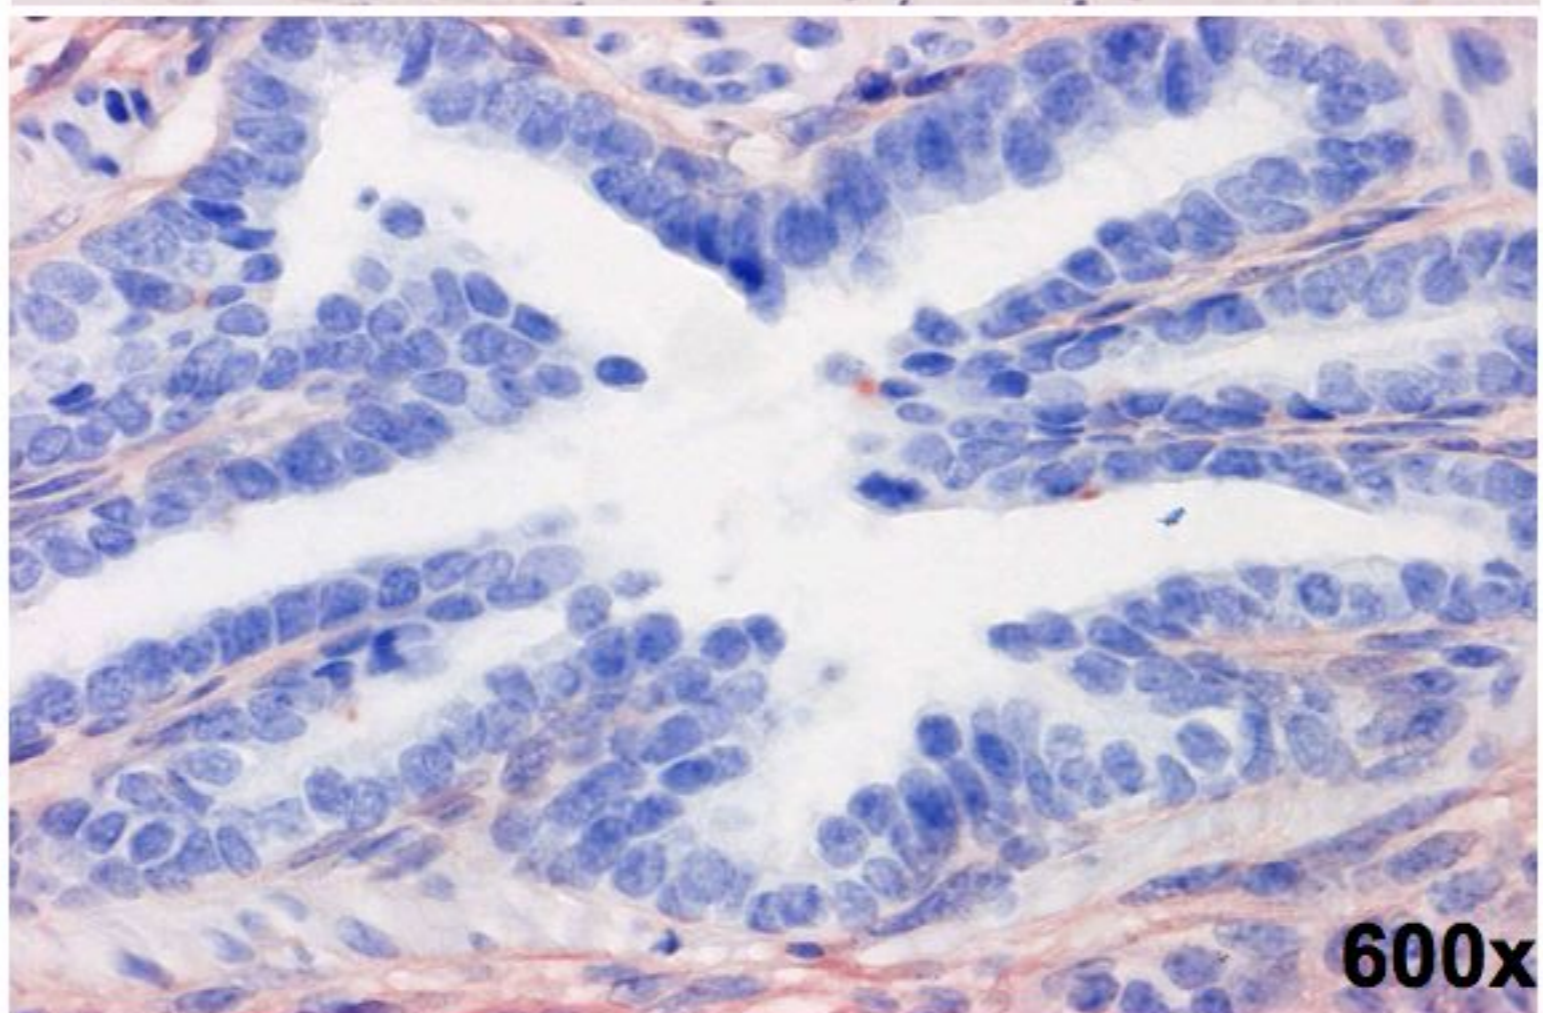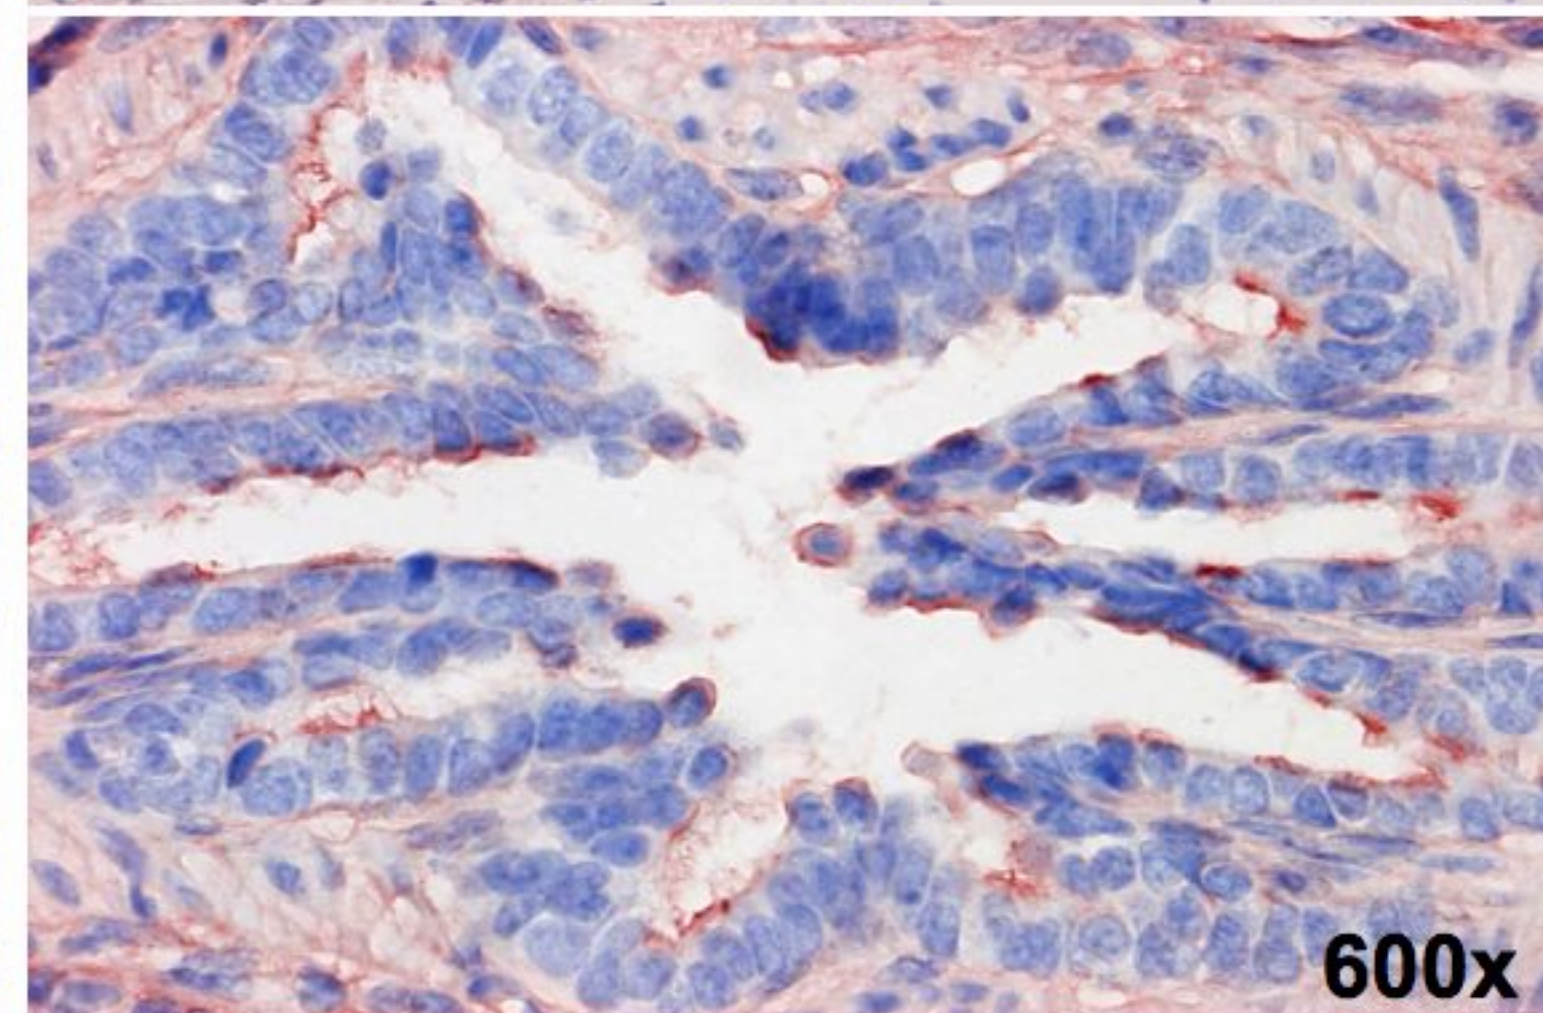

Alv.

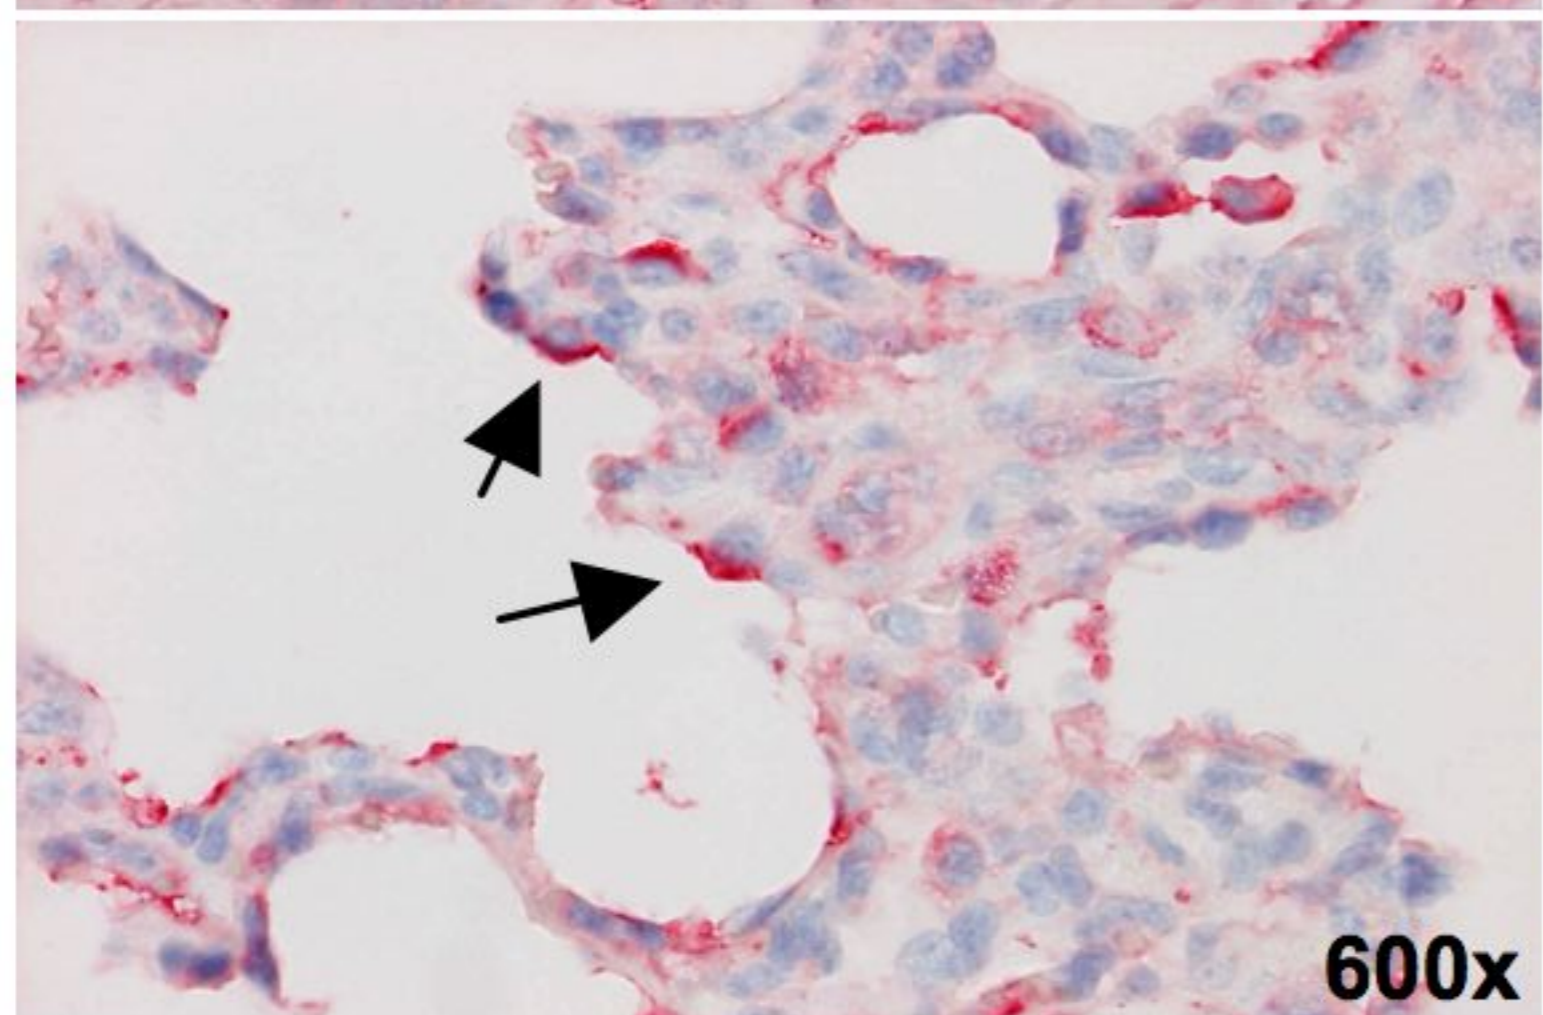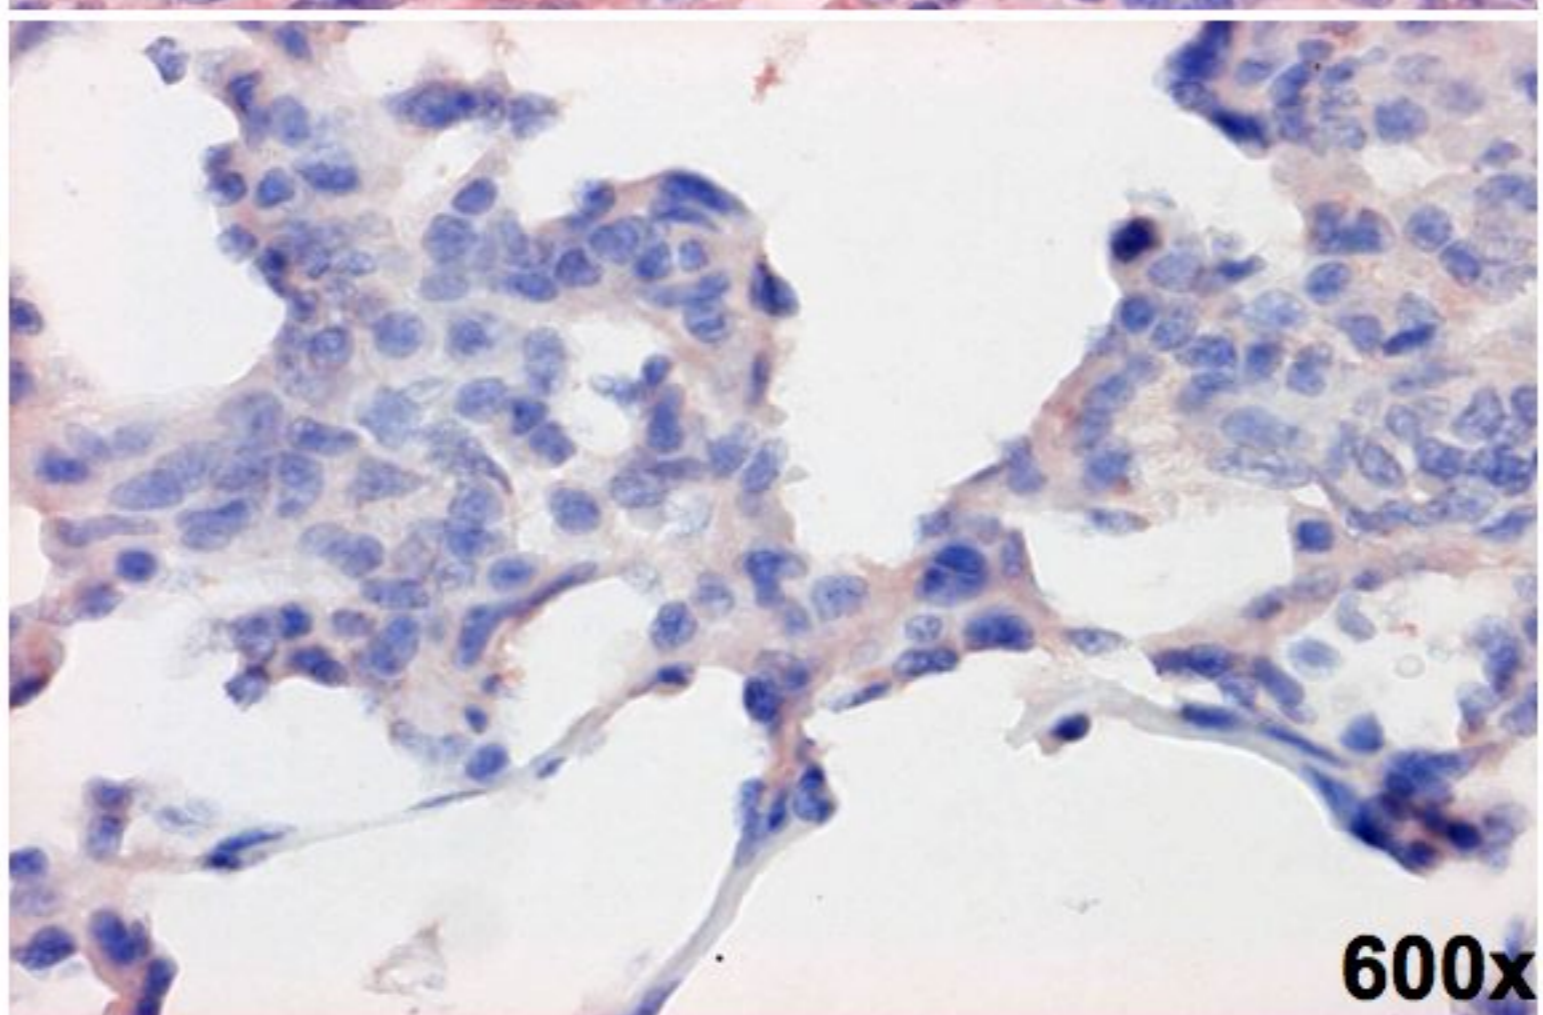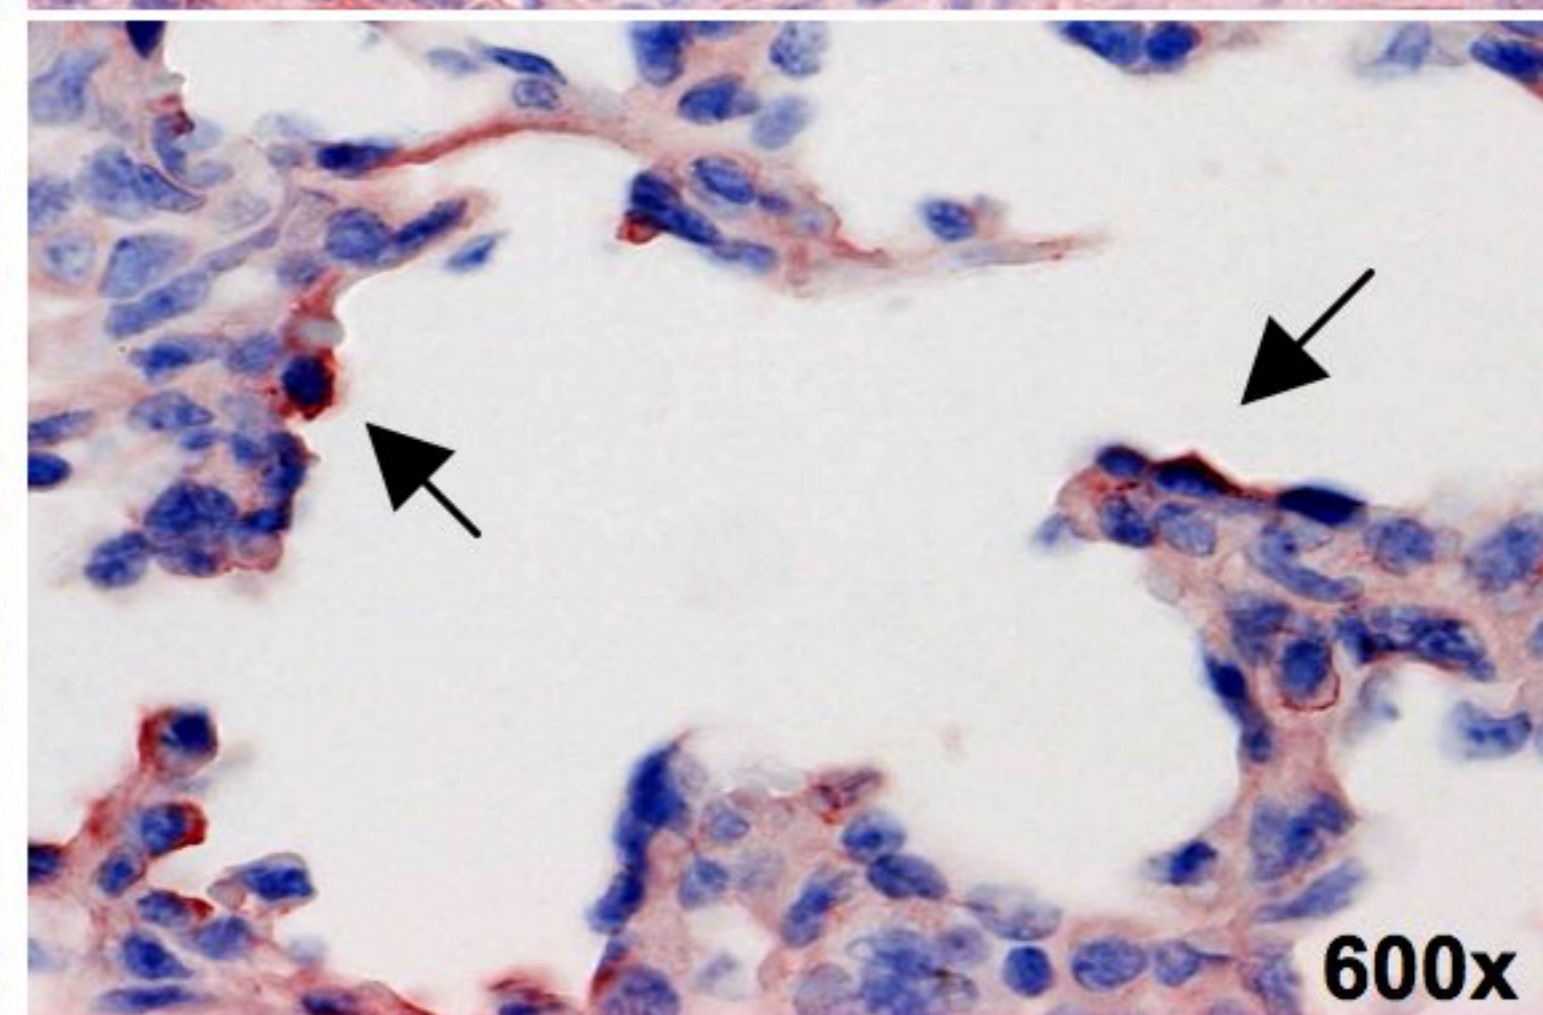

Supplement: MOESM4 [file 9609188]
